# Supplementary material
Source: PubMed Central journal article supplement (PMC7509854)
Supplement: advancesADV2020002662-suppl1.pdf [file advancesADV2020002662-suppl1.pdf]

# **ACVR1/JAK1/JAK2 Inhibitor Momelotinib Reverses Transfusion Dependency and Suppresses Hepcidin in Myelofibrosis Ph2 Trial**

S Oh, et al

## **Supplemental Data**

### **Figure Legend**

**Supplemental Figure 1. Erythropoiesis activity in TI-R and TI-NR subgroups.** Changes in biomarker levels in the TI-NR and TI-R subgroups in up to 24 weeks of treatment: reticulocytes (A), erythropoietin (B), transferrin saturation (C), and ferritin (D).

TI-NR transfusion-independent non-responders; TI-R, transfusion-independent responders.

**Supplemental Figure1A**

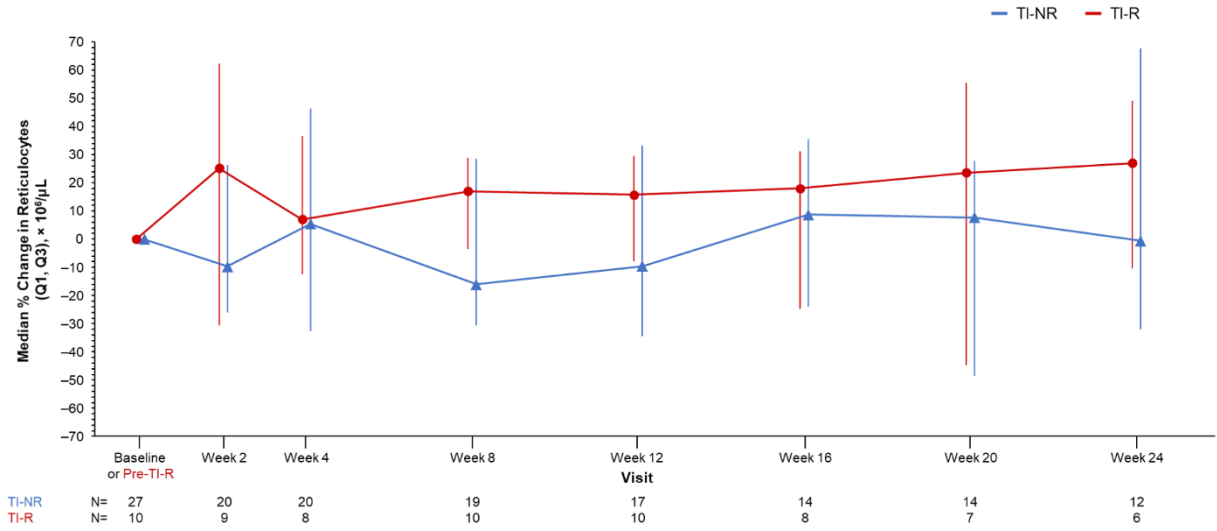

**Supplemental Figure1B**

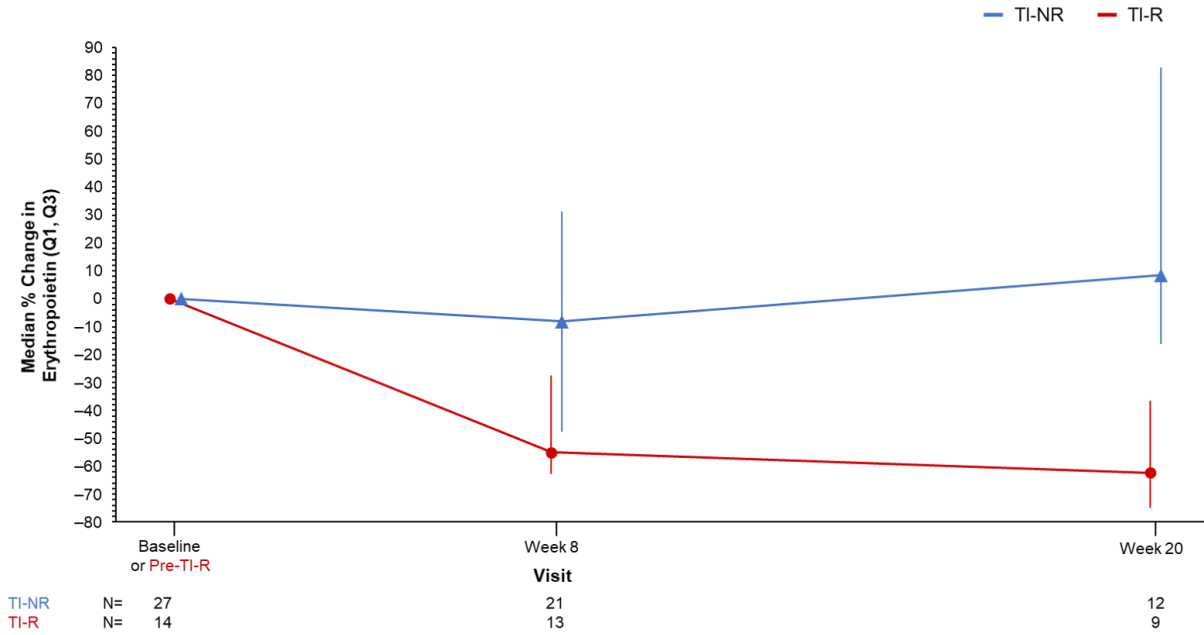

**Supplemental Figure1C**

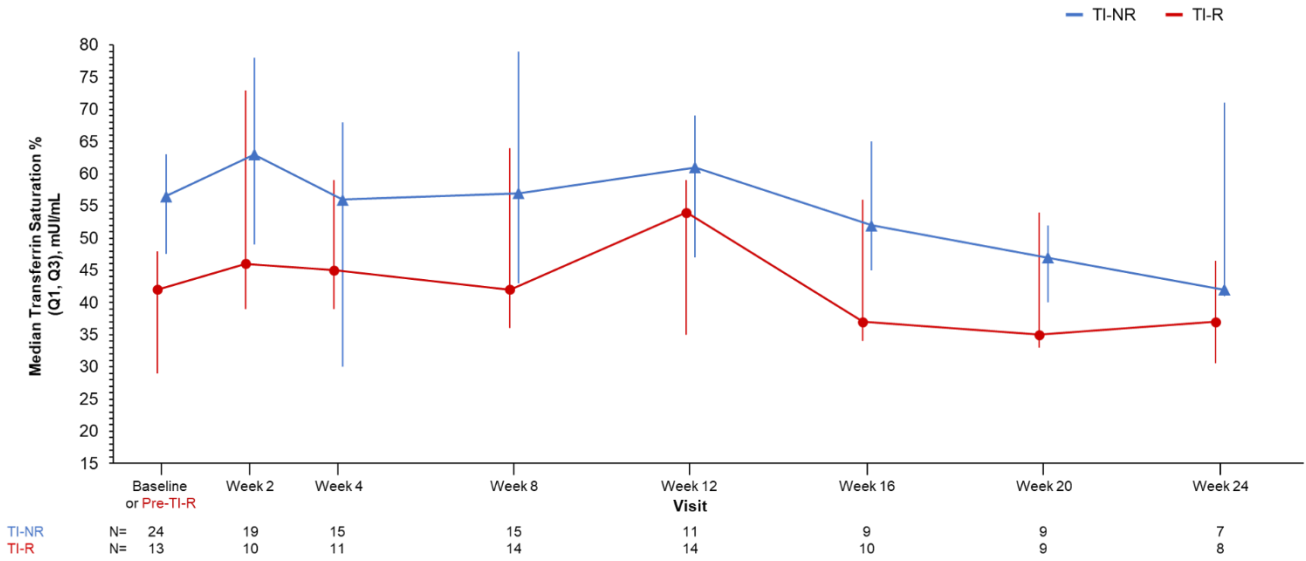

**Supplemental Figure1D**

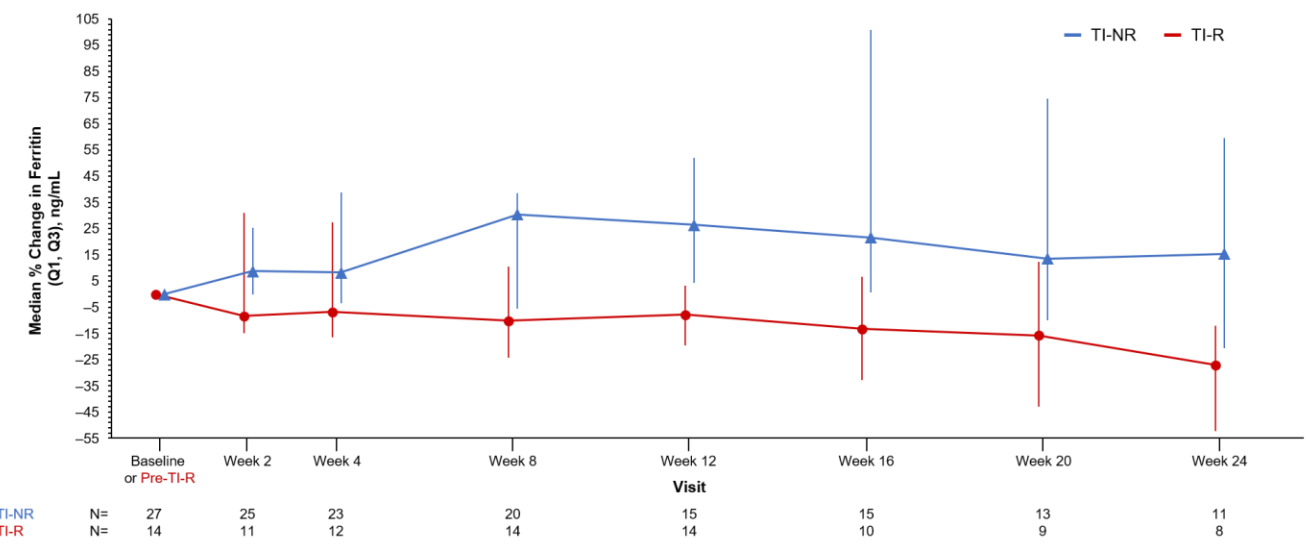

**Supplemental Table 1.** Median (interquartile range) values and change in biomarkers.

| <b>Biomarker</b> |       | <b>BL</b>                 | <b>Week 24</b>            | <b>Δ from BL</b>         | <b>% Δ from BL</b>    |
|------------------|-------|---------------------------|---------------------------|--------------------------|-----------------------|
| LIC, mg/g        | TI-R  | 2.4<br>(1.6, 4.0)         | 3.2<br>(1.8, 4.9)         | 0.2<br>(-0.2, 0.9)       | 4.7<br>(-18.4, 25.0)  |
|                  | TI-NR | 4.2<br>(2.6, 11.3)        | 6.9<br>(5.6, 12.1)        | 2.3<br>(0.5, 3.5)        | 53.3<br>(20.6, 86.2)  |
| Ferritin, ng/mL  | TI-R  | 605.9<br>(372.7, 1018.5)  | 635.0<br>(136.4, 1269.1)  | -30.7<br>(-231.3, 35.5)  | -14.2<br>(-40.2, 6.6) |
|                  | TI-NR | 1259.4<br>(441.6, 2321.5) | 1443.4<br>(937.5, 2908.0) | 218.8<br>(-100.4, 934.7) | 15.4<br>(-20.7, 59.7) |

BL, baseline; Δ, change; LIC, liver iron content; TI-NR transfusion-independent non-responders; TI-R, transfusion-independent responders.

**Supplemental Table 2.** Median (interquartile range) values for phosphorylated STAT3/total STAT3 ratio pre-dose and percent change at 2, 4, and 6 hours post-dose at first dose and at steady state.

| <b>Timepoint</b> |       | <b>Pre-dose</b>   | <b>Δ2 hr post-dose</b>  | <b>Δ4 hr post-dose</b> | <b>Δ6 hr post-dose</b> |
|------------------|-------|-------------------|-------------------------|------------------------|------------------------|
| Enrollment       | TI-R  | 0.9<br>(0.9, 1.0) | -13.2<br>(-38.9, -11.5) | -9.6<br>(-23.2, -0.5)  | -9.1<br>(-17.2, -5.7)  |
|                  | TI-NR | 0.8<br>(0.6, 1.0) | -15.5<br>(-23.2, 2.5)   | -9.7<br>(-28.0, -2.3)  | -3.7<br>(-12.1, 3.7)   |
| Week 4           | TI-R  | 0.9<br>(0.8, 1.0) | -14.3<br>(-17.5, 20.3)  | 3.0<br>(-32.9, 118.3)  | 12.5<br>(-29.4, 56.0)  |
|                  | TI-NR | 0.9<br>(0.9, 1.0) | -9.1<br>(-22.6, 9.6)    | -13.4<br>(-23.7, 23.9) | -6.1<br>(-17.1, 32.8)  |

BL, baseline; Δ, change; pSTAT3, phosphorylated signal transducer and activator of transcription 3; TI-NR transfusion-independent non-responders; TI-R, transfusion-independent responders.
